# Supplementary material
Source: publisher figshare collection journal article supplement (https://karger.figshare.com/ndownloader/files/13023761)
Supplement: Supplementary file 1 [file 13023761]

## Genetic sexing

DNA was extracted from muscle samples using a Gentra PureGene Tissue Kit following the manufacturer’s instructions. Samples were amplified for the CHD1 gene as recommended for non-ratite birds . The P2/P8 primers were used to amplify the CDH1 gene . Polymerase Chain Reaction (PCR) was conducted in a total volume of 10 µl containing ~10 ng of genomic DNA, 0.3 µM of each forward and reverse primer, 0.05 U Hot Start Taq (Qiagen), 150 µM each dNTP, 1·PCR buffer (Qiagen) consisting of Tris–HCl, KCl, and (NH4)2SO4, with a final concentration of 1.5 mM MgCl2. The following PCR amplification conditions were used: 30 cycles with 95°C for 30 s, 55°C annealing temperature for 30 s, and 72 °C for 30 s. An initial prolonged denaturation step (95 °C for 15 min) was included before the first cycle, and the last cycle was followed by an 8 min. extension. The amplified products were separated by electrophoresis on a 1% agarose gel and run through a 0.5·TBE buffer, at 120 volts for 45 mins, and visualised using GelRedTM (Biotium, Inc.) staining. Females are described by two distinct bands, while males are described by a single band of a different size. There was no contamination of the negative control and the positive controls were confirmed.

## Reference

Fridolfsson A-K, Ellegren H (1999) A simple and universal method for molecular sexing of non-ratite birds. Journal of Avian Biology 30:116-121
